# Supplementary material
Source: Springer Nature journal article supplement (https://www.springermedizin.de/resource/supplementary/12888_2014_1655_MOESM3_ESM.pdf/9481096)

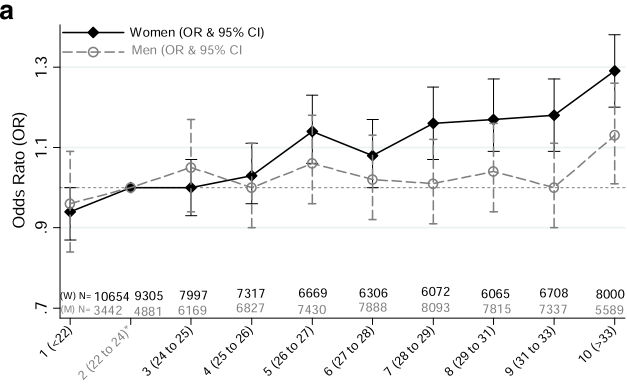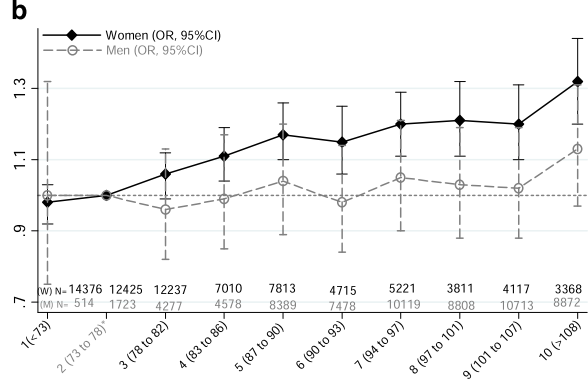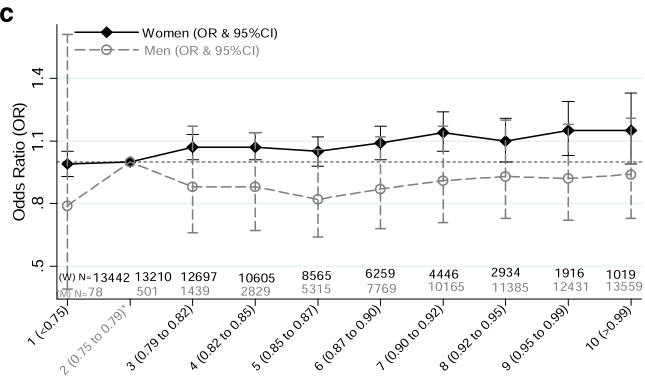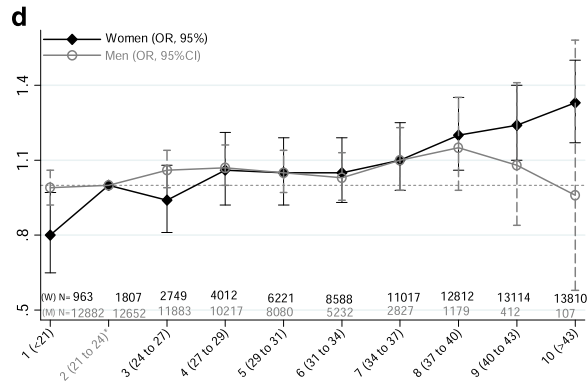

Supplement: MOESM3 [file 9481096]
